# Supplementary material for: High-quality organohalide lead perovskite films fabricated by layer-by-layer alternating vacuum deposition for high efficiency photovoltaics
Source: Royal Society of Chemistry journal article supplement (doi:10.1039/c6qm00379f), 2017-01-01
Supplement: c6qm00379f1.pdf [file c6qm00379f1.pdf]

## Supporting Information

### **High-Quality Organohalide Lead Perovskite Films Fabricated with Layer-by-Layer Alternating Vacuum Deposition for High Efficiency Photovoltaics**

Mohammad Mahdi Tavakoli<sup>a,b</sup>, Abdolreza Simchi<sup>b</sup>, Xiaoliang Mo<sup>c\*</sup> and Zhiyong Fan<sup>a\*</sup>

*<sup>a</sup>Department of Electronic and Computer Engineering, Hong Kong University of Science and Technology, Clear Water Bay, Kowloon, Hong Kong SAR, China*

*<sup>b</sup> Department of Materials Science and Engineering and Institute for Nanoscience and Nanotechnology, Sharif University of Technology, 14588 Tehran, Iran*

*<sup>c</sup>Department of Materials Science Fudan University Shanghai 200433 , P. R. China*

\*Corresponding author, emails: [eezfan@ust.hk](mailto:eezfan@ust.hk) (Z. Fan), [xlmo@fudan.edu.cn](mailto:xlmo@fudan.edu.cn) (X. Mo)

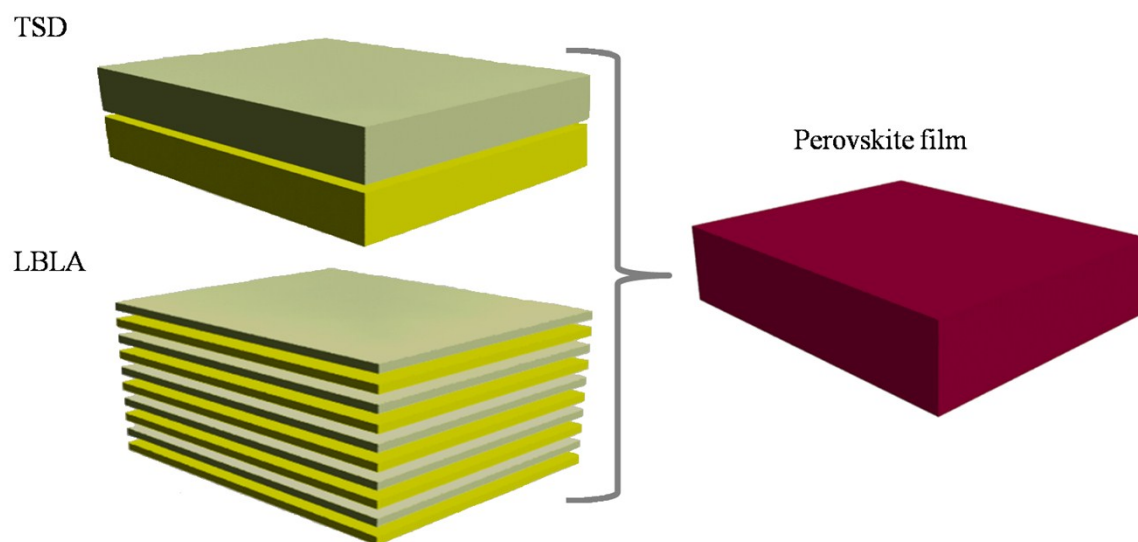

**Figure S1.** Schematic of the TSD and LBLA evaporation processes of perovskite film. The yellow, white, and brownish colors correspond to  $\text{PbI}_2$ , MAI, and Perovskite films, respectively.

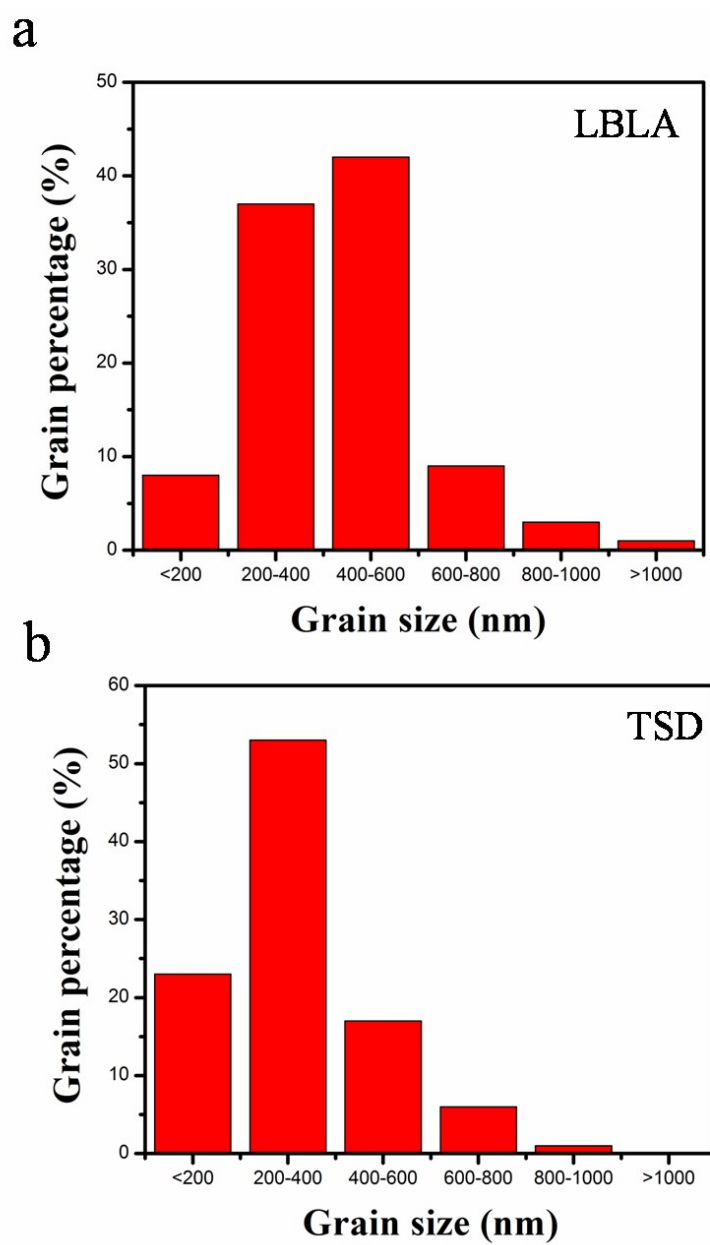

**Figure S2.** Statistical distribution diagrams of perovskite grain size for both LBLA (a) and TSD (b) methods.

**Table S1.** Fitting parameters of the corresponding PL decay curves

| Perovskite film on | $\tau$ (ns) | $\beta_I$ | $\chi$ |
|--------------------|-------------|-----------|--------|
| LBLA               | 25.6        | 1568.7    | 1.14   |
| TSD                | 16.3        | 1147.3    | 1.06   |
